# Supplementary material for: Examining soil carbon uncertainty in a global model: response of microbial decomposition to temperature, moisture and nutrient limitation
Source: Copernicus journal article supplement (doi:10.5194/bg-10-7095-2013), 2013-11-08
Supplement: Supplementary file 1 [file bg-10-7095-2013-supplement.pdf]

Supplementary Information to “Examining soil carbon uncertainty in a global model: response of microbial decomposition to temperature, moisture and nutrient limitation”

by

J.-F. Exbrayat<sup>1</sup>, A. J. Pitman<sup>1</sup>, Q. Zhang<sup>2</sup>, G. Abramowitz<sup>1</sup>, and Y.-P. Wang<sup>3</sup>

<sup>1</sup>ARC Centre of Excellence for Climate System Science and Climate Change Research Centre, University of New South Wales, Sydney, New South Wales, Australia

<sup>2</sup>College of Global Change and Earth System Science, Beijing Normal University, Beijing, China

<sup>3</sup>The Centre for Australian Weather and Climate Research, CSIRO Marine and Atmospheric Research, Private Bag 1, Aspendale, Victoria, Australia

Correspondence to: J.-F. Exbrayat ([j.exbrayat@unsw.edu.au](mailto:j.exbrayat@unsw.edu.au))

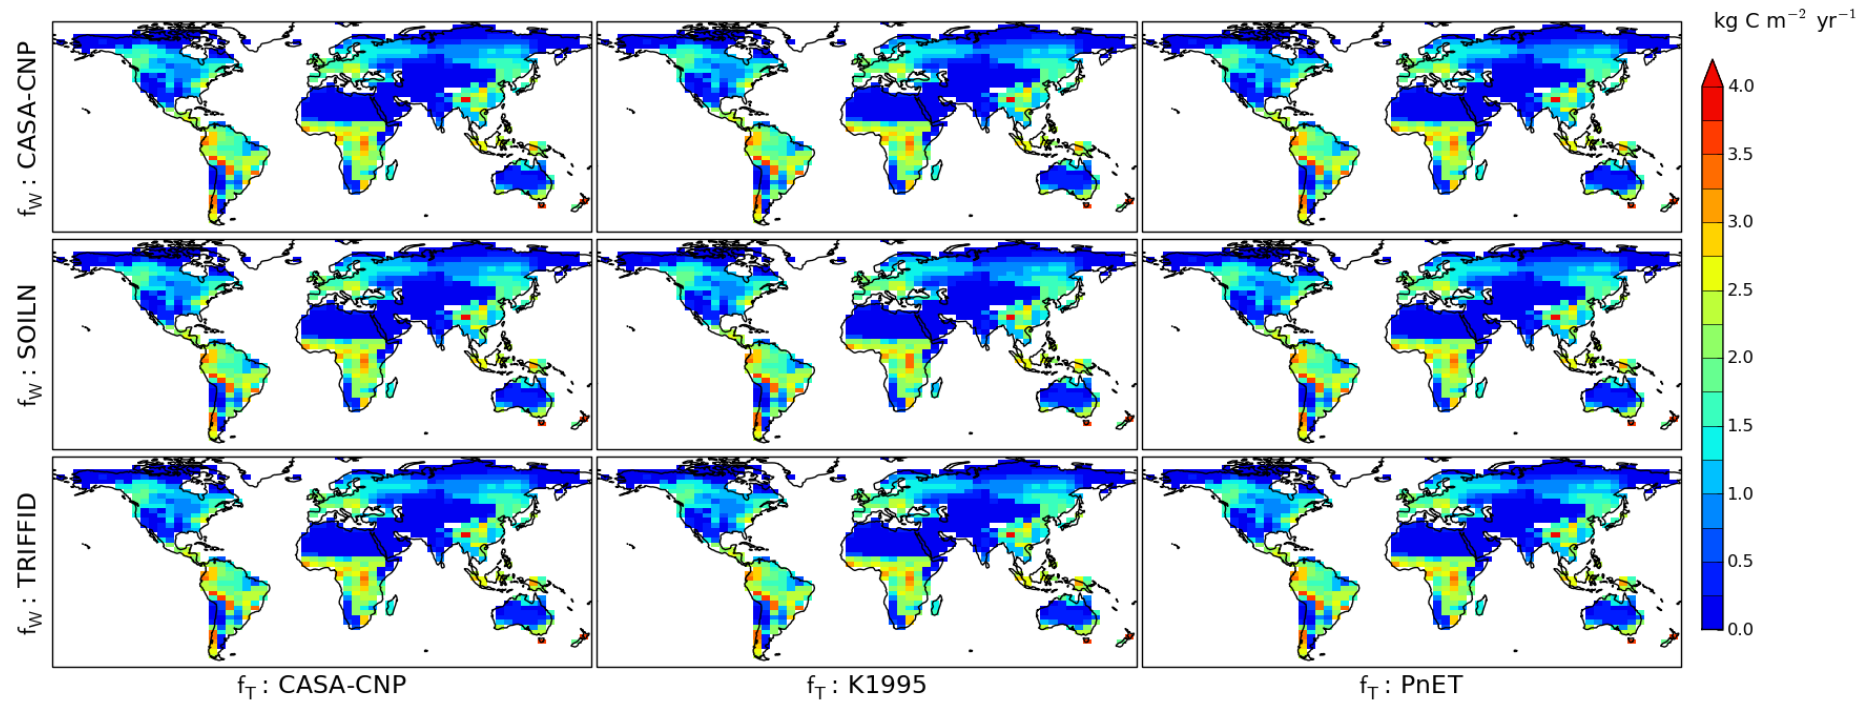

Figure S1. Average annual NPP in C-only historical simulations. Each sub-panel corresponds to a single combination of response functions as indicated.

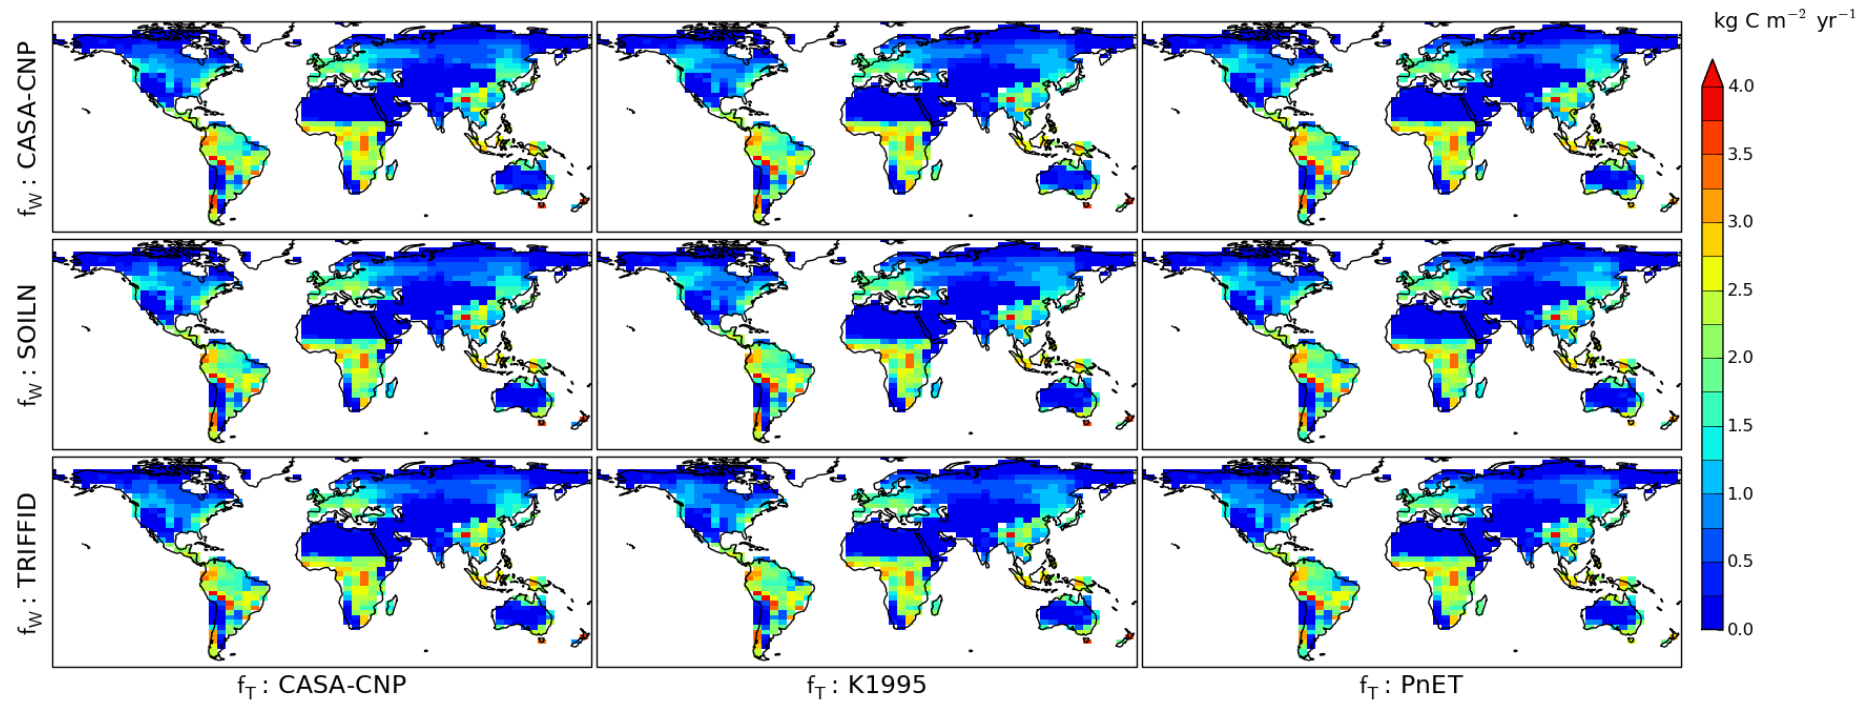

Figure S2. Average annual NPP in CN historical simulations. Each sub-panel corresponds to a single combination of response functions as indicated.

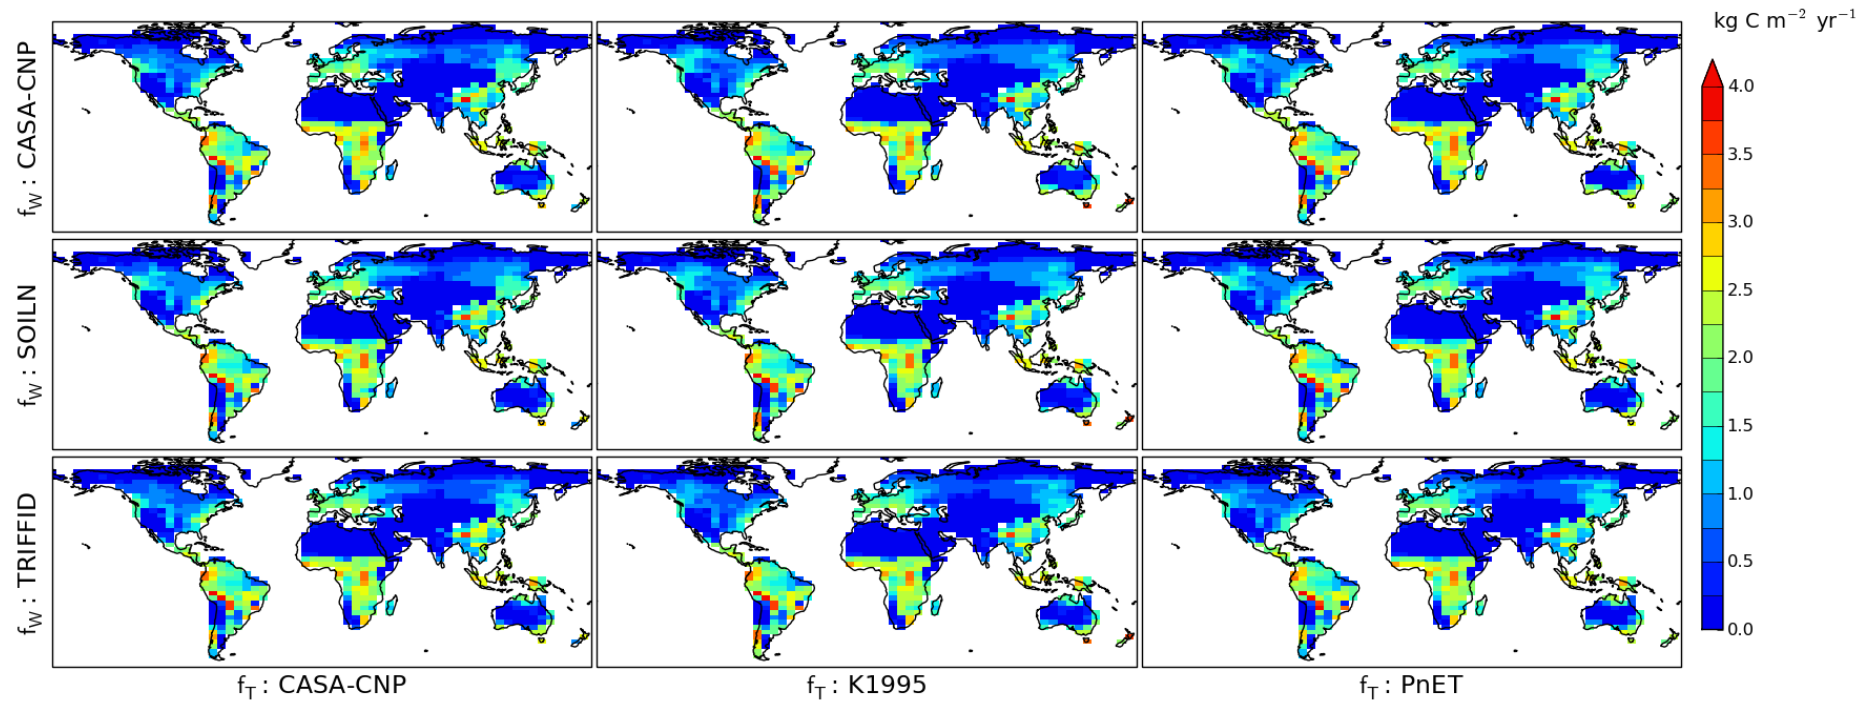

Figure S3. Average annual NPP in CNP historical simulations. Each sub-panel corresponds to a single combination of response functions as indicated.

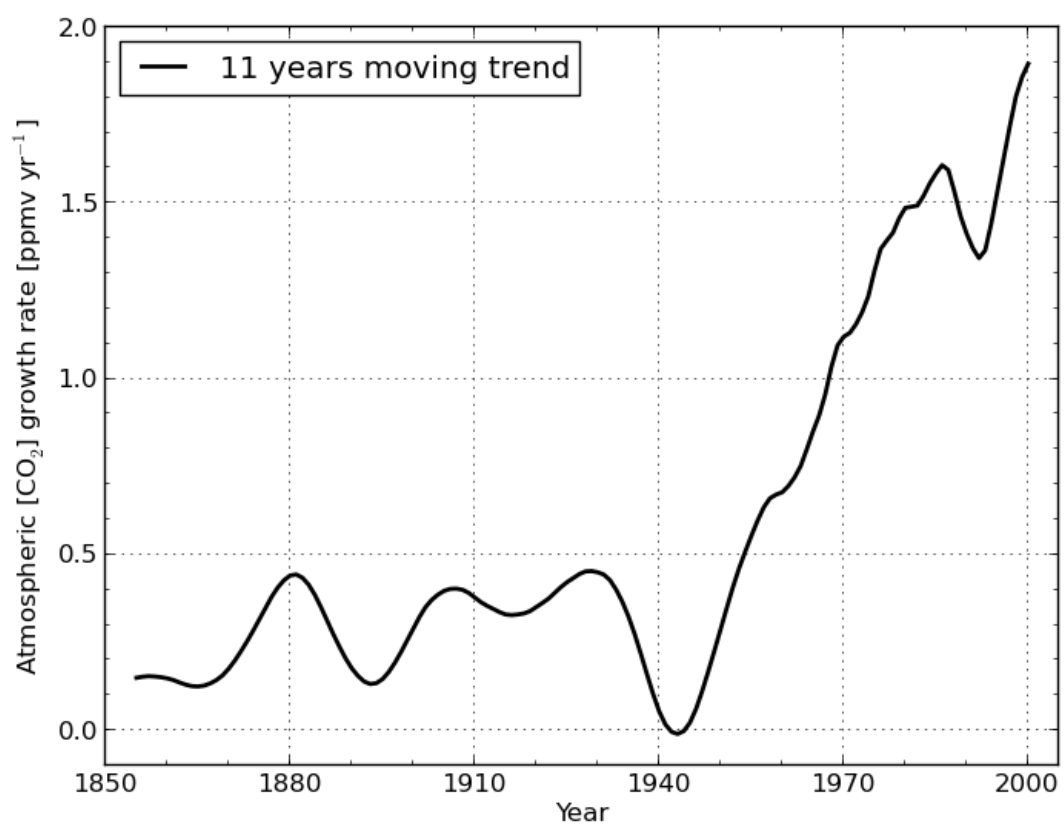

Figure S4. 11 year moving trend of atmospheric concentration growth rate

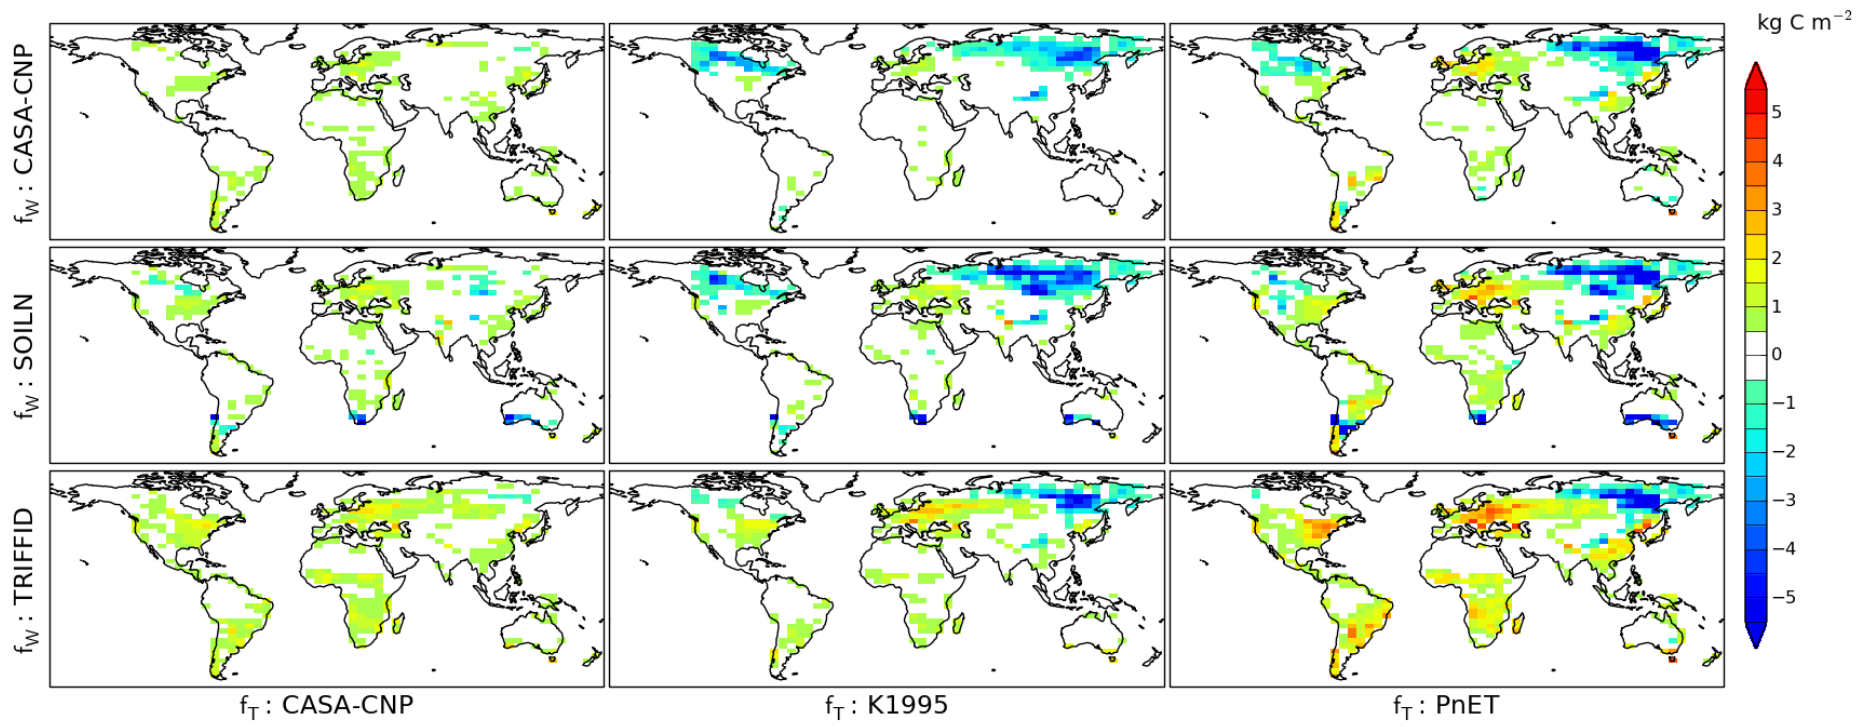

Figure S5. Change in soil carbon during historical simulations as represented by the difference in the average soil carbon between 1996 - 2005 and 1850 - 1859 in CN simulations. Each sub-panel corresponds to a single combination of response functions as indicated.

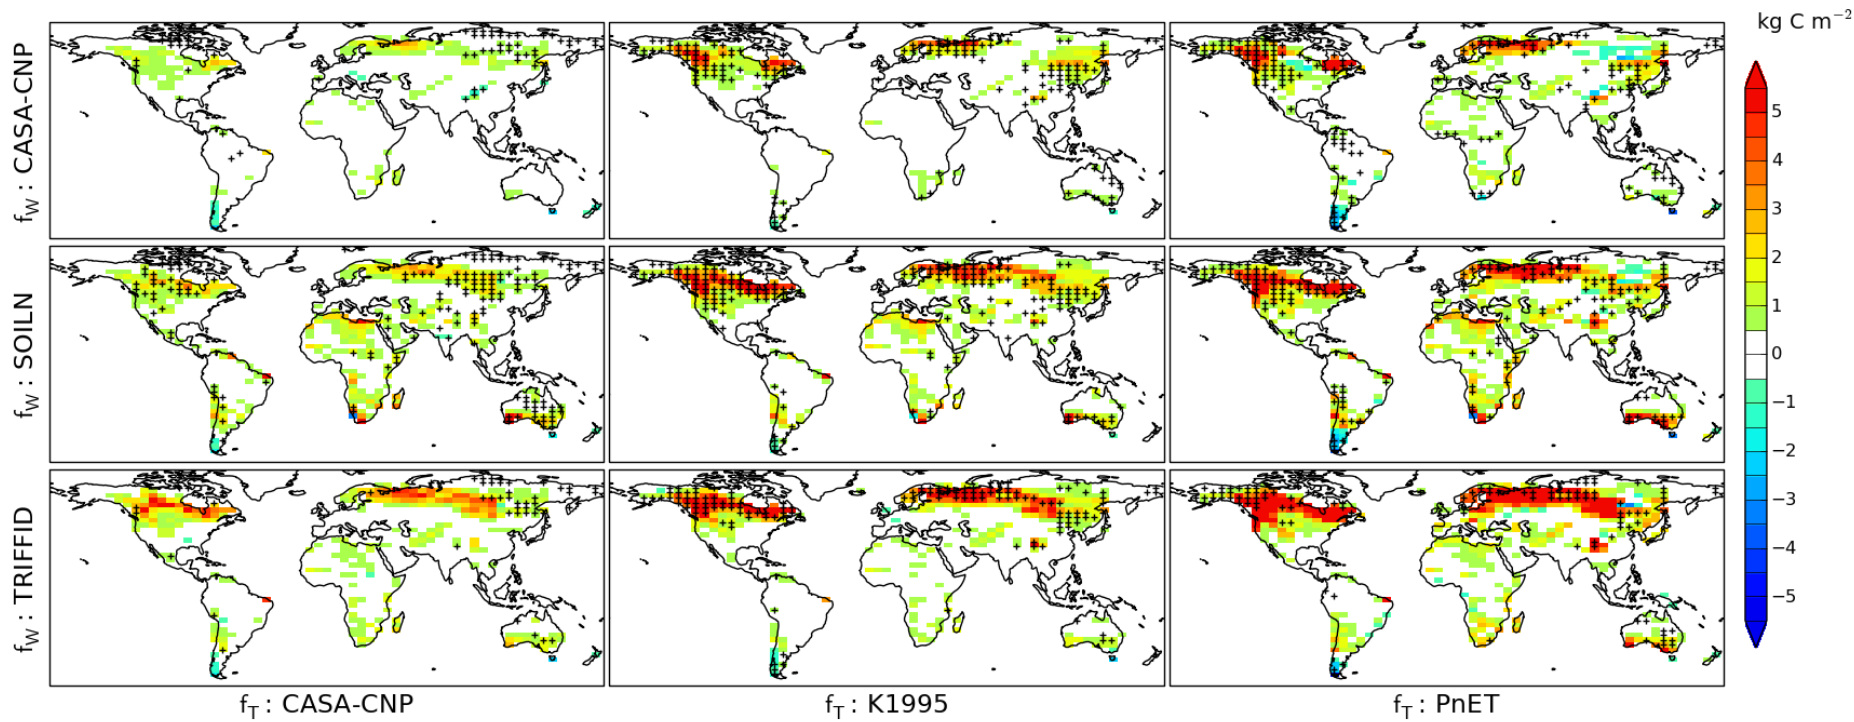

Figure S6. Difference in soil carbon change between C-only and CN historical simulations for the same combination of  $f_W$  and  $f_T$ . Stipples represent areas where the sign of NEA is different between C-only and CN simulations.

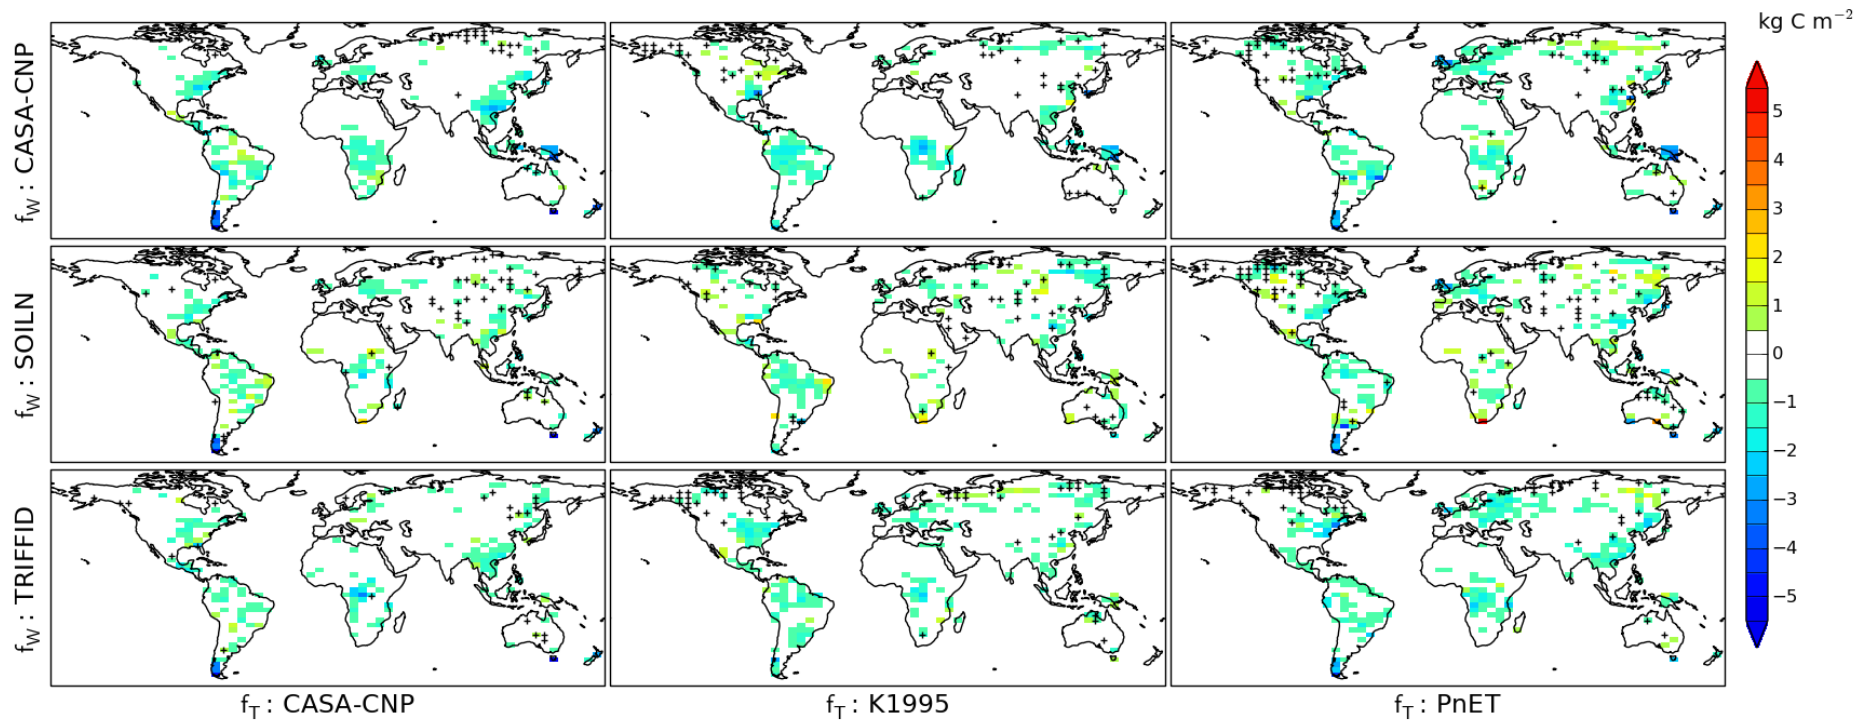

Figure S7. Difference in cumulative NEA between CNP and CN historical simulations for the same combination of  $f_W$  and  $f_T$ . Stipples represent areas where the sign of cumulative NEA is different between CNP and CN simulations.



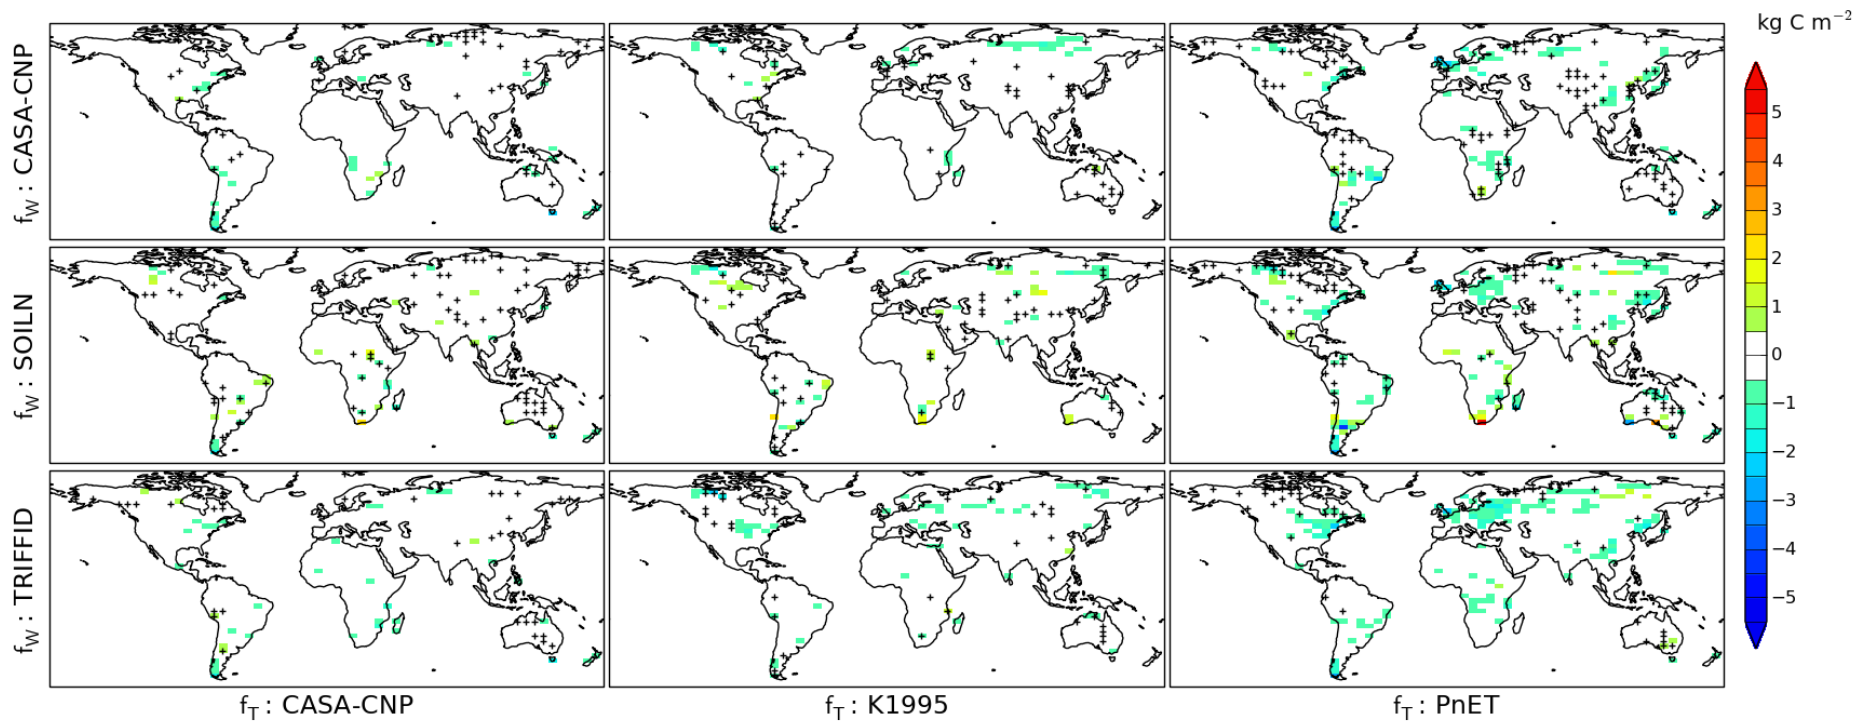

Figure S8. Difference in soil carbon change between CNP and CN historical simulations for the same combination of  $f_W$  and  $f_T$ . Stipples represent areas where the sign of NEA is different between CNP and CN simulations.
